# Supplementary material for: Barley yellow dwarf virus-GAV-derived vsiRNAs are involved in the production of wheat leaf yellowing symptoms by targeting chlorophyll synthase
Source: Virol J. 2020 Oct 21;17:158. doi: 10.1186/s12985-020-01434-7 (PMC7576850; doi:10.1186/s12985-020-01434-7)
Supplement: Supplementary file 3 — Additional file 3: Table S6. The results of predicted target mRNA cleavage sites of the vsiRNAs. [file 12985_2020_1434_MOESM3_ESM.xlsx]

## Sheet: 44-psRNATargetJob-1595816446232
miRNA_Acc.	Target_Acc.	Expectation	UPE$	miRNA_start	miRNA_end	Target_start	Target_end	miRNA_aligned_fragment	alignment	Target_aligned_fragment	Inhibition	Target_Desc.	Multiplicity
VsiRNA10286	Your_Sequence	4	-1	1	21	30	50	GAGAGGGAGGAUGAGGUGGAA	::.:: ::::.:::. :::	CGCCGCCACAUCUUCCUCCUC	Cleavage		1
VsiRNA10863	Your_Sequence	4	-1	1	20	31	50	GAGAGGGAGGAUGAGGUGGA	::.:: ::::.:::. :::	GCCGCCACAUCUUCCUCCUC	Cleavage		1
VsiRNA1760	Your_Sequence	4	-1	1	20	1078	1097	AGUUCGGAGAAUGGUUGUGG	:.:::::.::::.:: ..:	GCGCAACCGUUCUUCGUGUU	Cleavage		1
VsiRNA3314	Your_Sequence	4	-1	1	21	75	95	GGAGGUGGCGGGGUGGGUGAC	:. :.: :::.:::.:::::	CUUCCUCUCCCUGCCGCCUCC	Cleavage		2
VsiRNA3759	Your_Sequence	4	-1	1	22	29	50	GAGAGGGAGGAUGAGGUGGAAG	::.:: ::::.:::. :::	CCGCCGCCACAUCUUCCUCCUC	Cleavage		1
VsiRNA5314	Your_Sequence	4	-1	1	24	1074	1097	AGUUCGGAGAAUGGUUGUGGUCCA	:.:::::.::::.:: ..:	GAGUGCGCAACCGUUCUUCGUGUU	Cleavage		1
VsiRNA712	Your_Sequence	4	-1	1	23	1075	1097	AGUUCGGAGAAUGGUUGUGGUCC	:.:::::.::::.:: ..:	AGUGCGCAACCGUUCUUCGUGUU	Cleavage		1
VsiRNA7914	Your_Sequence	4	-1	1	22	1076	1097	AGUUCGGAGAAUGGUUGUGGUC	:.:::::.::::.:: ..:	GUGCGCAACCGUUCUUCGUGUU	Cleavage		1
VsiRNA8661	Your_Sequence	4	-1	1	24	27	50	GAGAGGGAGGAUGAGGUGGAAGAG	::.:: ::::.:::. :::	CGCCGCCGCCACAUCUUCCUCCUC	Cleavage		1
VsiRNA8856	Your_Sequence	4	-1	1	21	1077	1097	AGUUCGGAGAAUGGUUGUGGU	:.:::::.::::.:: ..:	UGCGCAACCGUUCUUCGUGUU	Cleavage		1
VsiRNA93	Your_Sequence	4	-1	1	22	74	95	GGAGGUGGCGGGGUGGGUGACC	: :. :.: :::.:::.:::::	GCUUCCUCUCCCUGCCGCCUCC	Cleavage		2
VsiRNA11163	Your_Sequence	4.5	-1	1	21	76	96	CGGAGGUGGCGGGGUGGGUGA	:. :.: :::.:::.:::::	UUCCUCUCCCUGCCGCCUCCU	Cleavage		2
VsiRNA2972	Your_Sequence	4.5	-1	1	20	82	100	GAGAGCGGAGGUGGCGGGGU	:::.:::.::::: .::::	UCCCUGCCGCCUCC-UUCUC	Cleavage		1
VsiRNA3804	Your_Sequence	4.5	-1	1	22	73	94	GAGGUGGCGGGGUGGGUGACCU	: :. :.: :::.:::.::::	CGCUUCCUCUCCCUGCCGCCUC	Cleavage		1
VsiRNA7162	Your_Sequence	4.5	-1	1	21	81	100	GAGAGCGGAGGUGGCGGGGUG	: :::.:::.::::: .::::	CUCCCUGCCGCCUCC-UUCUC	Cleavage		1
VsiRNA8664	Your_Sequence	4.5	-1	1	22	75	96	CGGAGGUGGCGGGGUGGGUGAC	:. :.: :::.:::.:::::	CUUCCUCUCCCUGCCGCCUCCU	Cleavage		2
VsiRNA9829	Your_Sequence	4.5	-1	1	21	74	94	GAGGUGGCGGGGUGGGUGACC	: :. :.: :::.:::.::::	GCUUCCUCUCCCUGCCGCCUC	Cleavage		1
VsiRNA1004	Your_Sequence	5	-1	1	24	77	100	GAGGAUGAGGUGGAAGAGGCCAGG	.: :: ::.:::: :.:::	UCCUCUCCCUGCCGCCUCCUUCUC	Cleavage		1
VsiRNA10235	Your_Sequence	5	-1	1	24	999	1022	UUCAAGAUCUCCUGUCGAACCCCC	::: :::: ::::::: :	GACAAUUCCCCAGGUGAUCUUGCA	Translation		1
VsiRNA11045	Your_Sequence	5	-1	1	19	35	53	GCCGAGAGGGAGGAUGAGG	:: ::::.:::. ::: ::	CCACAUCUUCCUCCUCCGC	Cleavage		1
VsiRNA11115	Your_Sequence	5	-1	1	21	81	101	GGAGGAUGAGGUGGAAGAGGC	.: :: ::.:::: :.:::.	CUCCCUGCCGCCUCCUUCUCU	Cleavage		1
VsiRNA11163	Your_Sequence	5	-1	1	21	41	61	CGGAGGUGGCGGGGUGGGUGA	::. :.:::::.:::.:	CUUCCUCCUCCGCCGCCUUCC	Cleavage		2
VsiRNA1375	Your_Sequence	5	-1	1	21	536	556	AUUCAAGAUCUCCUGUCGAAC	:.: .:: ::.:::::..:	UAUUGUUAGCAGGUCUUGGGU	Cleavage		1
VsiRNA1411	Your_Sequence	5	-1	1	21	1087	1108	CCAGCAGGCAGGAC-UGAGGUA	: :.::. ::.: :::::::::	UUCUUCGUGUUCGGCCUGCUGG	Translation		1
VsiRNA1530	Your_Sequence	5	-1	1	19	1089	1108	CCAGCAGGCAGGAC-UGAGG	:.::. ::.: :::::::::	CUUCGUGUUCGGCCUGCUGG	Translation		1
VsiRNA1687	Your_Sequence	5	-1	1	24	28	51	CGAGAGGGAGGAUGAGGUGGAAGA	::.:: ::::.:::. :::	GCCGCCGCCACAUCUUCCUCCUCC	Cleavage		1
VsiRNA1980	Your_Sequence	5	-1	1	21	31	51	CGAGAGGGAGGAUGAGGUGGA	::.:: ::::.:::. :::	GCCGCCACAUCUUCCUCCUCC	Cleavage		1
VsiRNA2007	Your_Sequence	5	-1	1	22	430	451	CUCGGGUAAACUAGUCCUUUAC	: :: ::::.:: :. :::::	AUUAAUGACUGGUAUGACCGAG	Cleavage		1
VsiRNA213	Your_Sequence	5	-1	1	24	920	943	GGACAGAUAGUUGAAAGAGACGCU	:: ::::.:::::::.	UCGACAUCACUCAAUUAUCUGUUG	Cleavage		1
VsiRNA2250	Your_Sequence	5	-1	1	20	432	451	CUCGGGUAAACUAGUCCUUU	:: ::::.:: :. :::::	UAAUGACUGGUAUGACCGAG	Cleavage		1
VsiRNA227	Your_Sequence	5	-1	1	21	544	564	AGUGCCCAACUCCAGAGCGUG	: ::: :.::::::..::	GCAGGUCUUGGGUUGGGUGCU	Cleavage		1
VsiRNA2538	Your_Sequence	5	-1	1	20	1089	1109	ACCAGCAGGCAGGAC-UGAGG	:.::. ::.: ::::::::::	CUUCGUGUUCGGCCUGCUGGU	Translation		1
VsiRNA2603	Your_Sequence	5	-1	1	20	389	408	ACGAGGGCCAGACUUGAAUA	:.:: : ::::::.:: .::	UGUUAAUGUCUGGUCCAUGU	Cleavage		1
VsiRNA2774	Your_Sequence	5	-1	1	20	34	53	GCCGAGAGGGAGGAUGAGGU	.:: ::::.:::. ::: ::	GCCACAUCUUCCUCCUCCGC	Cleavage		1
VsiRNA2870	Your_Sequence	5	-1	1	21	1078	1098	CAGUUCGGAGAAUGGUUGUGG	:.:::::.::::.:: ..:	GCGCAACCGUUCUUCGUGUUC	Cleavage		1
VsiRNA2930	Your_Sequence	5	-1	1	24	1075	1098	CAGUUCGGAGAAUGGUUGUGGUCC	:.:::::.::::.:: ..:	AGUGCGCAACCGUUCUUCGUGUUC	Cleavage		1
VsiRNA3095	Your_Sequence	5	-1	1	20	1088	1108	CCAGCAGGCAGGAC-UGAGGU	:.::. ::.: :::::::::	UCUUCGUGUUCGGCCUGCUGG	Translation		1
VsiRNA3314	Your_Sequence	5	-1	1	21	40	60	GGAGGUGGCGGGGUGGGUGAC	::. :.:::::.:::.:	UCUUCCUCCUCCGCCGCCUUC	Cleavage		2
VsiRNA3338	Your_Sequence	5	-1	1	22	922	943	GGACAGAUAGUUGAAAGAGACG	:: ::::.:::::::.	GACAUCACUCAAUUAUCUGUUG	Cleavage		1
VsiRNA3554	Your_Sequence	5	-1	1	24	1084	1108	CCAGCAGGCAGGAC-UGAGGUAUUC	.: :.::. ::.: :::::::::	CCGUUCUUCGUGUUCGGCCUGCUGG	Translation		1
VsiRNA3563	Your_Sequence	5	-1	1	21	80	100	GAGGAUGAGGUGGAAGAGGCC	.: :: ::.:::: :.:::	UCUCCCUGCCGCCUCCUUCUC	Cleavage		1
VsiRNA3626	Your_Sequence	5	-1	1	21	388	408	ACGAGGGCCAGACUUGAAUAC	:.:: : ::::::.:: .::	AUGUUAAUGUCUGGUCCAUGU	Cleavage		1
VsiRNA3692	Your_Sequence	5	-1	1	22	32	53	GCCGAGAGGGAGGAUGAGGUGG	::.:: ::::.:::. ::: ::	CCGCCACAUCUUCCUCCUCCGC	Cleavage		1
VsiRNA3809	Your_Sequence	5	-1	1	19	1080	1098	CAGUUCGGAGAAUGGUUGU	.:::::.::::.:: ..:	GCAACCGUUCUUCGUGUUC	Cleavage		1
VsiRNA3920	Your_Sequence	5	-1	1	21	1089	1110	GACCAGCAGGCAGGAC-UGAGG	:.::. ::.: ::::::::::.	CUUCGUGUUCGGCCUGCUGGUU	Cleavage		1
VsiRNA423	Your_Sequence	5	-1	1	21	808	828	AAGAUCAUGCACGCCAUCGAU	:::: : :::: :::::.::	AUCGCUAUCGUGAAUGAUUUU	Cleavage		1
VsiRNA4251	Your_Sequence	5	-1	1	21	923	943	GGACAGAUAGUUGAAAGAGAC	:: ::::.:::::::.	ACAUCACUCAAUUAUCUGUUG	Cleavage		1
VsiRNA4408	Your_Sequence	5	-1	1	22	76	97	GCGGAGGUGGCGGGGUGGGUGA	:. :.: :::.:::.:::::	UUCCUCUCCCUGCCGCCUCCUU	Cleavage		2
VsiRNA4408	Your_Sequence	5	-1	1	22	8	29	GCGGAGGUGGCGGGGUGGGUGA	: :::::..: .:.:: ::::	CCUCCCACUUCCUCGCCGCCGC	Translation		2
VsiRNA4516	Your_Sequence	5	-1	1	24	78	101	GGAGGAUGAGGUGGAAGAGGCCAG	.: :: ::.:::: :.:::.	CCUCUCCCUGCCGCCUCCUUCUCU	Cleavage		1
VsiRNA4594	Your_Sequence	5	-1	1	22	30	51	CGAGAGGGAGGAUGAGGUGGAA	::.:: ::::.:::. :::	CGCCGCCACAUCUUCCUCCUCC	Cleavage		1
VsiRNA5125	Your_Sequence	5	-1	1	20	924	943	GGACAGAUAGUUGAAAGAGA	:: ::::.:::::::.	CAUCACUCAAUUAUCUGUUG	Cleavage		1
VsiRNA5260	Your_Sequence	5	-1	1	22	1087	1109	ACCAGCAGGCAGGAC-UGAGGUA	: :.::. ::.: ::::::::::	UUCUUCGUGUUCGGCCUGCUGGU	Translation		1
VsiRNA5263	Your_Sequence	5	-1	1	22	528	549	AUCUGCAAUCAAUACUACUUUC	..::: ::::: : ::::.:	CUGGGUAUUAUUGUUAGCAGGU	Cleavage		1
VsiRNA5374	Your_Sequence	5	-1	1	20	923	942	GACAGAUAGUUGAAAGAGAC	:: ::::.:::::::.	ACAUCACUCAAUUAUCUGUU	Cleavage		1
VsiRNA5544	Your_Sequence	5	-1	1	22	1001	1022	UUCAAGAUCUCCUGUCGAACCC	::: :::: ::::::: :	CAAUUCCCCAGGUGAUCUUGCA	Translation		1
VsiRNA5552	Your_Sequence	5	-1	1	19	82	100	GAGGAUGAGGUGGAAGAGG	.: :: ::.:::: :.:::	UCCCUGCCGCCUCCUUCUC	Cleavage		1
VsiRNA5758	Your_Sequence	5	-1	1	22	535	556	AUUCAAGAUCUCCUGUCGAACC	:.: .:: ::.:::::..:	UUAUUGUUAGCAGGUCUUGGGU	Cleavage		1
VsiRNA5848	Your_Sequence	5	-1	1	22	1088	1110	GACCAGCAGGCAGGAC-UGAGGU	:.::. ::.: ::::::::::.	UCUUCGUGUUCGGCCUGCUGGUU	Cleavage		1
VsiRNA5988	Your_Sequence	5	-1	1	20	81	100	GAGGAUGAGGUGGAAGAGGC	.: :: ::.:::: :.:::	CUCCCUGCCGCCUCCUUCUC	Cleavage		1
VsiRNA6599	Your_Sequence	5	-1	1	22	387	408	ACGAGGGCCAGACUUGAAUACG	: :.:: : ::::::.:: .::	CAUGUUAAUGUCUGGUCCAUGU	Cleavage		1
VsiRNA6617	Your_Sequence	5	-1	1	22	807	828	AAGAUCAUGCACGCCAUCGAUA	:::: : :::: :::::.::	GAUCGCUAUCGUGAAUGAUUUU	Cleavage		1
VsiRNA6650	Your_Sequence	5	-1	1	22	1086	1108	CCAGCAGGCAGGAC-UGAGGUAU	.: :.::. ::.: :::::::::	GUUCUUCGUGUUCGGCCUGCUGG	Translation		1
VsiRNA6861	Your_Sequence	5	-1	1	22	921	942	GACAGAUAGUUGAAAGAGACGC	:: ::::.:::::::.	CGACAUCACUCAAUUAUCUGUU	Cleavage		1
VsiRNA7227	Your_Sequence	5	-1	1	21	431	451	CUCGGGUAAACUAGUCCUUUA	: :: ::::.:: :. :::::	UUAAUGACUGGUAUGACCGAG	Cleavage		1
VsiRNA7548	Your_Sequence	5	-1	1	21	1088	1109	ACCAGCAGGCAGGAC-UGAGGU	:.::. ::.: ::::::::::	UCUUCGUGUUCGGCCUGCUGGU	Translation		1
VsiRNA762	Your_Sequence	5	-1	1	21	954	974	UACAGCUUUACAGAGGUCAAG	: ::: : ::: ::::::::	CCUGAGCACUGGUAAGCUGUA	Translation		1
VsiRNA7817	Your_Sequence	5	-1	1	23	921	943	GGACAGAUAGUUGAAAGAGACGC	:: ::::.:::::::.	CGACAUCACUCAAUUAUCUGUUG	Cleavage		1
VsiRNA7963	Your_Sequence	5	-1	1	21	33	53	GCCGAGAGGGAGGAUGAGGUG	:.:: ::::.:::. ::: ::	CGCCACAUCUUCCUCCUCCGC	Cleavage		1
VsiRNA8280	Your_Sequence	5	-1	1	22	1077	1098	CAGUUCGGAGAAUGGUUGUGGU	:.:::::.::::.:: ..:	UGCGCAACCGUUCUUCGUGUUC	Cleavage		1
VsiRNA843	Your_Sequence	5	-1	1	24	805	828	AAGAUCAUGCACGCCAUCGAUAGU	:::: : :::: :::::.::	GGGAUCGCUAUCGUGAAUGAUUUU	Cleavage		1
VsiRNA8450	Your_Sequence	5	-1	1	22	79	100	GAGGAUGAGGUGGAAGAGGCCA	.: :: ::.:::: :.:::	CUCUCCCUGCCGCCUCCUUCUC	Cleavage		1
VsiRNA8646	Your_Sequence	5	-1	1	22	953	974	UACAGCUUUACAGAGGUCAAGA	:: ::: : ::: ::::::::	UCCUGAGCACUGGUAAGCUGUA	Translation		1
VsiRNA8664	Your_Sequence	5	-1	1	22	40	61	CGGAGGUGGCGGGGUGGGUGAC	::. :.:::::.:::.:	UCUUCCUCCUCCGCCGCCUUCC	Cleavage		2
VsiRNA87	Your_Sequence	5	-1	1	21	529	549	AUCUGCAAUCAAUACUACUUU	..::: ::::: : ::::.:	UGGGUAUUAUUGUUAGCAGGU	Cleavage		1
VsiRNA93	Your_Sequence	5	-1	1	22	39	60	GGAGGUGGCGGGGUGGGUGACC	::. :.:::::.:::.:	AUCUUCCUCCUCCGCCGCCUUC	Cleavage		2
VsiRNA9362	Your_Sequence	5	-1	1	24	951	974	UACAGCUUUACAGAGGUCAAGAAG	: :: ::: : ::: ::::::::	CCUCCUGAGCACUGGUAAGCUGUA	Translation		1
VsiRNA9589	Your_Sequence	5	-1	1	24	30	53	GCCGAGAGGGAGGAUGAGGUGGAA	::.:: ::::.:::. ::: ::	CGCCGCCACAUCUUCCUCCUCCGC	Cleavage		1
VsiRNA9590	Your_Sequence	5	-1	1	23	31	53	GCCGAGAGGGAGGAUGAGGUGGA	::.:: ::::.:::. ::: ::	GCCGCCACAUCUUCCUCCUCCGC	Cleavage		1
VsiRNA981	Your_Sequence	5	-1	1	22	774	795	UAUGCUAUACAAGGCAAAUGGU	:.: : :.::::: ::::::	CCUAACUACUUUGUACAGCAUA	Cleavage		1
